# Supplementary material for: The use of heart rate variability analysis to detect arrhythmias in horses undergoing a standard treadmill exercise test
Source: PubMed Central journal article supplement — J Vet Intern Med. 2018 Dec 5;33(1):212–24. doi: 10.1111/jvim.15358 (PMC6335521; doi:10.1111/jvim.15358), 2018-12-05
Supplement: JVIM-33-212-s002.pdf [file JVIM-33-212-s002.pdf]

**Supplementary Table 1: Population characteristics of the study population, divided by groups.**

mc, male castrated; f, female; m, male; Group H, healthy; Group A, arrhythmias; Group O, other; T, trot phase; C, canter phase; R, recovery phase; APC, atrial premature complex; VPC, ventricular premature complex; VT, ventricular tachycardia; PD, punctuated decelerations (marked sinus arrhythmia, sinus pause, sinus block); AVB, AV-block; EIPH, exercise-induced pulmonary haemorrhage; IAD, inflammatory airway disease; ICC, intra-cardiac catheter.

| Study no.      | Age (years) | Sex | Breed                 | Diagnosis                                | Arrhythmias                                            |
|----------------|-------------|-----|-----------------------|------------------------------------------|--------------------------------------------------------|
| <b>Group H</b> |             |     |                       |                                          |                                                        |
| 3              | 8           | f   | Swiss Warmblood       | healthy - ICC                            |                                                        |
| 4              | 16          | f   | Swiss Warmblood       | healthy                                  |                                                        |
| 5              | 9           | mc  | Swiss Warmblood       | healthy                                  |                                                        |
| 12             | 11          | mc  | Hanoverian Warmblood  | healthy                                  |                                                        |
| 18             | 16          | mc  | Swiss Warmblood       | healthy - ICC                            |                                                        |
| 25             | 9           | mc  | Dutch Warmblood       | healthy                                  |                                                        |
| 27             | 8           | mc  | Mecklenburg Warmblood | healthy                                  |                                                        |
| 28             | 9           | f   | Oldenburg Warmblood   | healthy                                  |                                                        |
| 29             | 7           | f   | Swiss Warmblood       | healthy                                  |                                                        |
| 32             | 3           | f   | Thoroughbred          | healthy                                  |                                                        |
| 47             | 16          | mc  | Irish Warmblood       | healthy                                  |                                                        |
| 48             | 7           | mc  | Swiss Warmblood       | healthy                                  |                                                        |
| 56             | 14          | mc  | Swiss Warmblood       | healthy                                  |                                                        |
| <b>Group A</b> |             |     |                       |                                          |                                                        |
| 1              | 19          | mc  | Westphalian Warmblood | mild-moderate mitral insufficiency - ICC | R: 3x APC                                              |
| 2              | 15          | mc  | Polish Warmblood      | Healthy - ICC                            | R: 1x VPC                                              |
| 6              | 16          | f   | Austrian Warmblood    | mild-moderate mitral insufficiency - ICC | C: 1x VPC                                              |
| 8              | 12          | f   | Arabian               | gastric ulcers                           | R: 5x PD                                               |
| 9              | 15          | mc  | Arabian               | moderate-severe aortic insufficiency     | C: 1x APC                                              |
| 10             | 11          | mc  | Hanoverian Warmblood  | healthy                                  | C: 6x APC                                              |
| 13             | 5           | mc  | Swiss Warmblood       | healthy - ICC                            | R: 14x VPC                                             |
| 14             | 10          | mc  | Swiss Warmblood       | healthy - ICC                            | R: 2x APC                                              |
| 15             | 16          | mc  | Swiss Warmblood       | healthy - ICC                            | C: 2x APC, 1x VPC<br>R: 2x APC, 2x VPC                 |
| 16             | 10          | mc  | Swiss Warmblood       | healthy - ICC                            | R: 2x APC                                              |
| 17             | 12          | mc  | Swiss Warmblood       | healthy - ICC                            | T: 1x VPC<br>C: 1x APC<br>R: 1x VPC                    |
| 19             | 9           | mc  | Swiss Warmblood       | healthy - ICC                            | R: 1x APC, 1x VPC                                      |
| 20             | 10          | f   | Swiss Warmblood       | healthy - ICC                            | C: 2x VPC<br>R: 12x VPC, 1x 2 <sup>nd</sup> degree AVB |
| 21             | 5           | mc  | Swiss Warmblood       | healthy - ICC                            | R: 1x VPC, 2x PD                                       |

|    |    |    |                       |                                          |                                                       |
|----|----|----|-----------------------|------------------------------------------|-------------------------------------------------------|
| 22 | 15 | f  | Swiss Warmblood       | healthy - ICC                            | T: 1x APC                                             |
| 23 | 17 | mc | Swiss Warmblood       | healthy - ICC                            | R: 1x VPC                                             |
| 26 | 11 | mc | Oldenburg Warmblood   | mild-moderate mitral insufficiency - ICC | R: 1x APC                                             |
| 31 | 9  | mc | Irish Warmblood       | gastric ulcers                           | R: PD                                                 |
| 33 | 4  | f  | Thoroughbred          | EIPH                                     | R: 2x VPC                                             |
| 36 | 14 | mc | Austrian Warmblood    | arrhythmias                              | T: 1x VPC<br>C: 7x VPC (short run of VT)<br>R: 9x VPC |
| 38 | 14 | mc | Holstein Warmblood    | severe aortic insufficiency              | R: 3x VPC                                             |
| 39 | 10 | mc | Swiss Warmblood       | healthy                                  | R: 5x VPC                                             |
| 42 | 3  | mc | Swiss Warmblood       | ventricular septal defect                | T: 5x VPC<br>C: 6x VPC                                |
| 43 | 11 | f  | Belgian Warmblood     | arrhythmias                              | T: 5x VPC<br>R: 1x VPC                                |
| 44 | 7  | mc | French Warmblood      | healthy                                  | R: 17x PD                                             |
| 45 | 23 | mc | Belgian Warmblood     | healthy                                  | T: 2x VPC                                             |
| 46 | 8  | f  | Westphalian Warmblood | idiopathic laryngeal hemiplegia          | R: 29x APC                                            |
| 49 | 10 | mc | Swiss Warmblood       | healthy                                  | R: 2x PD                                              |
| 54 | 9  | f  | Arabian               | healthy                                  | R: 5x PD                                              |
| 37 | 4  | mc | Thoroughbred          | collapse of undiagnosed origin           | R: 2x PD                                              |

---

**Group O**

---

|    |    |    |                       |                                                                        |
|----|----|----|-----------------------|------------------------------------------------------------------------|
| 7  | 8  | f  | Slovakian Warmblood   | moderate mitral and tricuspid insufficiency - ICC                      |
| 24 | 17 | mc | Irish Warmblood       | moderate aortic insufficiency                                          |
| 30 | 9  | mc | Oldenburg Warmblood   | bronchitis, back issues                                                |
| 35 | 8  | mc | Hanoverian Warmblood  | interstitial pneumonia, EIPH, neoplasia                                |
| 37 | 4  | mc | Thoroughbred          | collapse of undiagnosed origin                                         |
| 40 | 11 | mc | Italian Warmblood     | severe aortic and mild mitral insufficiency                            |
| 41 | 19 | mc | Pony                  | chronic bronchitis                                                     |
| 50 | 8  | f  | Holstein Warmblood    | IAD, gastric ulcers, selenium deficiency                               |
| 51 | 9  | f  | Westphalian Warmblood | gastric ulcers                                                         |
| 52 | 8  | mc | Brandenburg Warmblood | tendonitis of the superficial digital flexor tendon, patellar fixation |
| 53 | 3  | m  | Quarter Horse         | piroplasmosis                                                          |
| 55 | 4  | mc | Thoroughbred          | EIPH                                                                   |

---
